# Supplementary material for: Oxygen vacancies enhance the photocatalytic deep oxidation of NO over an N-doped KNbO3 catalyst
Source: Royal Society of Chemistry journal article supplement (doi:10.1039/d2cy01656g), 2022-11-14
Supplement: d2cy01656g1.pdf [file d2cy01656g1.pdf]

**Appendix A: Supporting Information (SI):**

**Oxygen vacancies enhance the photocatalytic deep  
oxidation of NO over N-doped KNbO<sub>3</sub> catalyst**

*Xinjie Song<sup>a,b</sup>, Wenjie Jiang<sup>a,b</sup>, Zehua Cai<sup>a,b</sup>, Xun Chen<sup>a</sup>, Wenxin Dai<sup>a,b\*</sup>, Xianzhi*

*Fu<sup>a\*</sup>*

<sup>a</sup> Research Institute of Photocatalysis, State Key Laboratory of Photocatalysis on  
Energy and Environment, Fuzhou University, Fuzhou, 350002, China

<sup>b</sup> Key Laboratory of Eco-materials Advanced Technology (Fuzhou University), Fujian  
Province University, Fuzhou, 350002, China

\*Corresponding author: Wenxin Dai

Tel & Fax: +86-591-83779083

E-mail: [daiwenxin@fzu.edu.cn](mailto:daiwenxin@fzu.edu.cn) & [xzfu@fzu.edu.cn](mailto:xzfu@fzu.edu.cn)

### SI 1. The figure of the reactor

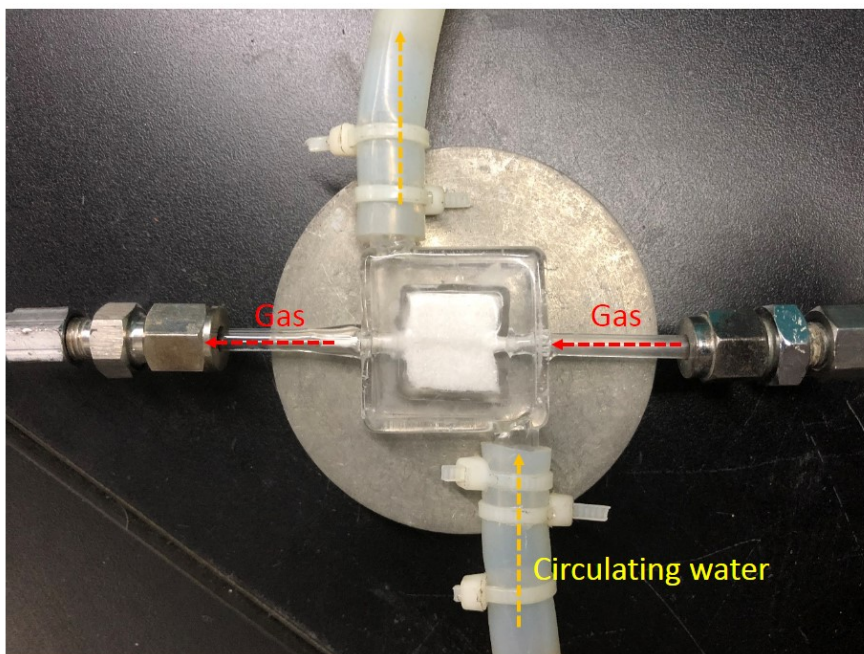

Fig. S1. The reactor with circulating water bath

### SI 2. Reactor schematic and reaction system

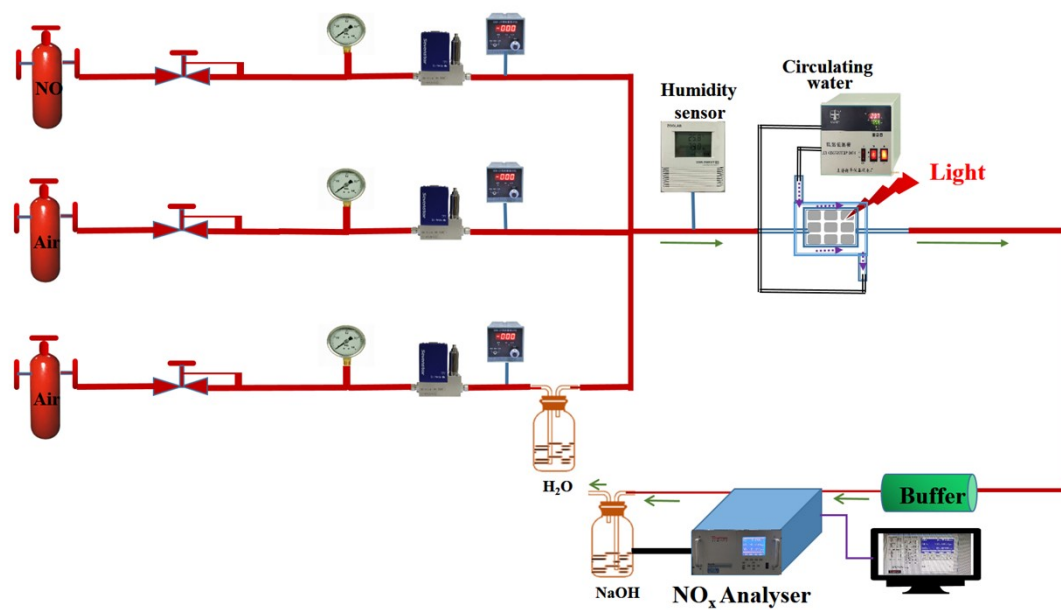

Fig. S2. The reaction system for the catalyst samples evaluation

### SI 3. The digital photo of samples

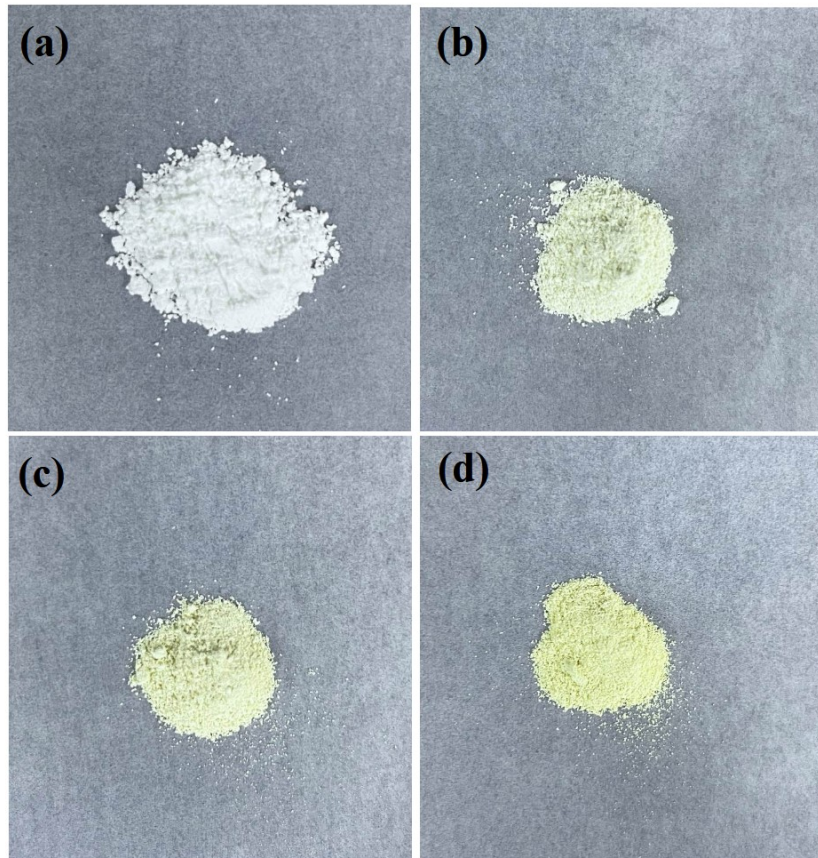

**Fig. S3.** The digital photo of the  $\text{KNbO}_3$  (a),  $1.0\text{-N-KNbO}_3$  (b),  $1.5\text{-N-KNbO}_3$  (c) and  $2.0\text{-N-KNbO}_3$  (d), respectively

#### SI 4. Lattice parameters

**Table S1.** Lattice parameters of  $\text{KNbO}_3$ ,  $1.0\text{-N-KNbO}_3$ ,  $1.5\text{-N-KNbO}_3$  and  $2.0\text{-N-KNbO}_3$

| samples               | Lattice parameters ( $\text{\AA}$ ) |       |       |
|-----------------------|-------------------------------------|-------|-------|
|                       | a                                   | b     | c     |
| $\text{KNbO}_3$       | 3.971                               | 5.692 | 5.719 |
| $1.0\text{-N-KNbO}_3$ | 3.971                               | 5.697 | 5.723 |
| $1.5\text{-N-KNbO}_3$ | 3.971                               | 5.697 | 5.723 |
| $2.0\text{-N-KNbO}_3$ | 3.971                               | 5.697 | 5.723 |

#### SI 5. Band gaps analyses

The band gaps for as-synthesized samples were calculated using the following empirical equation:

$$(\alpha h\nu)^n = A \cdot (h\nu - E_g)$$

where  $\alpha$  is the absorption coefficient,  $h$  is the Planck constant,  $\nu$  is light frequency,  $A$  is a constant,  $E_g$  is the bandgap energy, respectively. The value of  $n$  is equivalent to 2, which corresponds to direct semiconductors, to 1/2 for the indirect transition. In this case, the direct transition is observed. Thus,  $n$  is 2 in this work.

### SI 6. Textural characteristics (N<sub>2</sub>-physisorption)

The N<sub>2</sub> adsorption-desorption isothermal plots of the as-prepared catalyst were shown in Fig. S4. The isotherms of these samples were classical type IV with a type H3 hysteresis loop according to IUPAC. The specific surface area of KNbO<sub>3</sub> was 3.63 m<sup>2</sup> g<sup>-1</sup> by the BET calculation method. Moreover, the specific surface area, pore volume and pore size did not change significantly after N doping (Table S2).

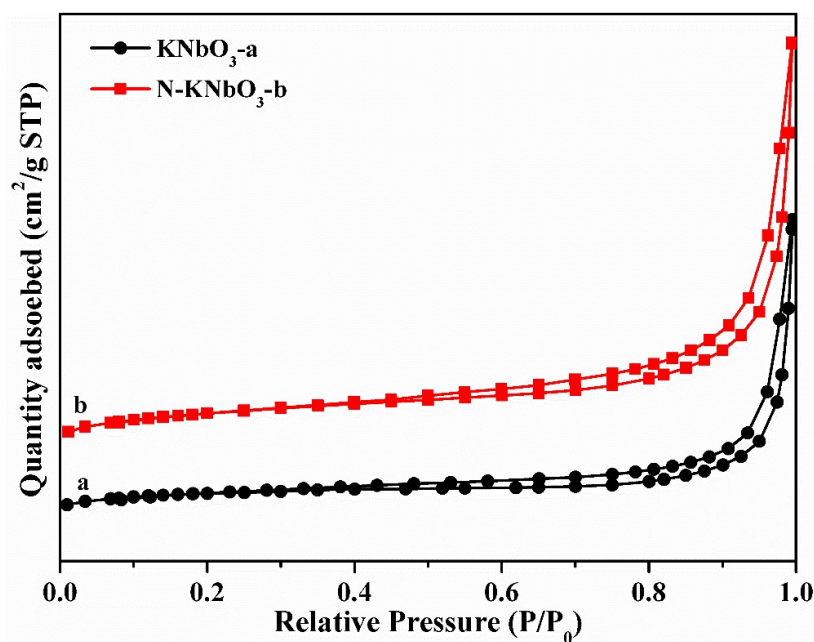

Fig. S4. The N<sub>2</sub> adsorption-desorption isotherms of KNbO<sub>3</sub> and N-KNbO<sub>3</sub>

**Table S2.** Specific surface area and pore structure parameters of KNbO<sub>3</sub> and N-KNbO<sub>3</sub>

| sample              | Surface area<br>(m <sup>2</sup> g <sup>-1</sup> ) | Pore<br>volume (mL g <sup>-1</sup> )<br>1) | Pore<br>diameter (nm) |
|---------------------|---------------------------------------------------|--------------------------------------------|-----------------------|
| KNbO <sub>3</sub>   | 3.63                                              | 0.013                                      | 14.28                 |
| N-KNbO <sub>3</sub> | 5.46                                              | 0.017                                      | 13.35                 |

**SI 7. The mapping and EDX**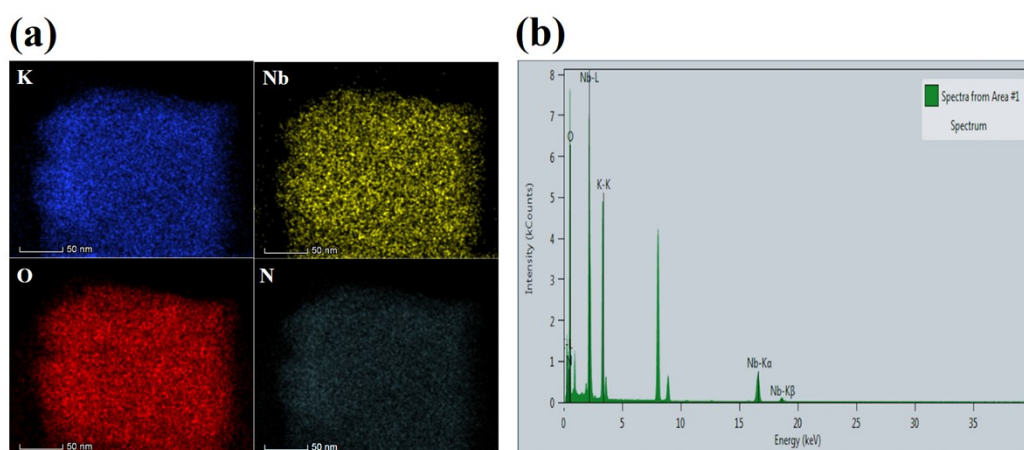**Fig. S5.** The mapping and EDX spectra of N-KNbO<sub>3</sub> (a, b) of N-KNbO<sub>3</sub>**Table. S3.** Determination of the amount of N doping

| Samples                 | N doping<br>(at.%) | N doping<br>(at.%) |
|-------------------------|--------------------|--------------------|
| 1.5-N-KNbO <sub>3</sub> | 7.12 <sup>a</sup>  | 6.85 <sup>b</sup>  |

a: Determined by EDX spectra. b: XPS.

According to different test characterizations, the content of incorporated N was approximately 7at.%.

**SI 8. NO<sub>x</sub> species distribution**

The amount of nitrate ( $n_{\text{NO}_3^-}$ ) and nitrite ( $n_{\text{NO}_2^-}$ ) accumulated during the catalytic oxidation of NO was measured by Thermo Fisher Dionex Aquion ion chromatography. The specific method was as follows: fully immerse the catalyst sample after continuous reaction in 100 mL of deionized water, wash and filter to obtain the

supernatant, and then take 5 mL into the ion chromatography tube for sample analysis.

In addition, the total NO removal ( $n_{\text{NO}}$ ) and  $\text{NO}_2$  production ( $n_{\text{NO}_2}$ ) are calculated using the following formula:

$$n_{\text{NO}} = (f/22.4) \int (\Phi_{\text{NO}} - \Phi_{\text{NO}_i}) dt$$

$$n_{\text{NO}_2} = (f/22.4) \int \Phi_{\text{NO}_2} dt$$

**Table S4.** The total amounts of NO removal and different  $\text{NO}_x$  production after five cycle tests at room temperatures over  $\text{KNbO}_3$  and X-N- $\text{KNbO}_3$  samples

| Sample                 | $n_{\text{NO}}/\text{umol}$ | $n_{\text{NO}_2}/\text{umol}$ | $n_{\text{NO}_2^-}/\text{umol}$ | $n_{\text{NO}_3^-}/\text{umol}$ | $n_{\text{other}}/\text{umol}$ |
|------------------------|-----------------------------|-------------------------------|---------------------------------|---------------------------------|--------------------------------|
| $\text{KNbO}_3$        | 1.133                       | 0.283                         | 0.397                           | 0.283                           | 0.170                          |
| 1.0-N- $\text{KNbO}_3$ | 4.522                       | 0.565                         | 1.967                           | 0.995                           | 0.995                          |
| 1.5-N- $\text{KNbO}_3$ | 5.638                       | 0.676                         | 2.594                           | 1.297                           | 1.071                          |
| 2.0-N- $\text{KNbO}_3$ | 4.404                       | 0.616                         | 1.762                           | 1.145                           | 0.881                          |

### SI 9. Band structure analysis

In Fig. S6a and b, the valence band energy of  $\text{KNbO}_3$  and 1.5-N- $\text{KNbO}_3$  is 2.56 and 2.38 eV. According to the formula:  $E_{\text{NHE/V}} = \Phi + \text{VB}_{\text{max}} - 4.44$  ( $\Phi$  is the electronic work function of the instrument, 4.2 eV), the valence band position NHE (PH=7) is 2.32 and 2.14 V. According to the experimental results of DRS in the manuscript, the bandgap of  $\text{KNbO}_3$  and 1.5-N- $\text{KNbO}_3$  are 3.30 and 2.83 eV. Finally, we conclude that the conduction bands of  $\text{KNbO}_3$  and 1.5-N- $\text{KNbO}_3$  are -0.98 and -0.69 V.

The energy band structure of the sample is shown in Fig. S7. The doping of N introduces oxygen vacancies to form defect energy levels, which increases the valence band position of  $\text{KNbO}_3$  and reduces the bandgap. In addition, the positions of the valence band and conduction band can meet the formation requirements of ROS ( $\cdot\text{O}_2^-$  and  $\cdot\text{OH}$ ).

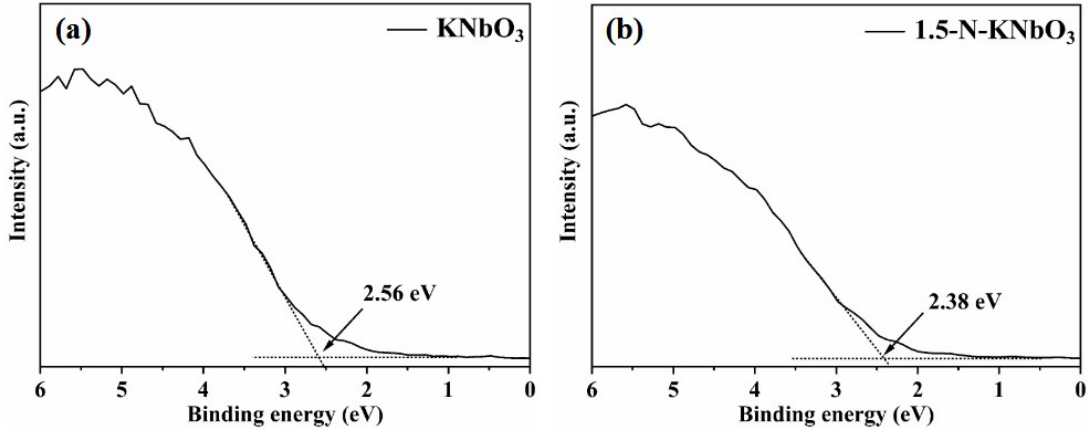

Fig. S6. The value bands of KNbO<sub>3</sub> (a) and 1.5-N- KNbO<sub>3</sub> (b)

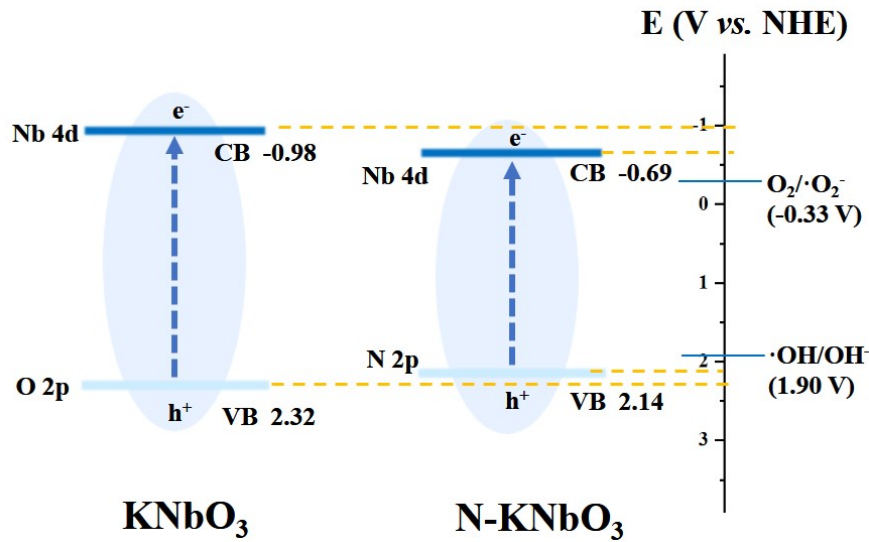

Fig. S7. The band structure of KNbO<sub>3</sub> (a) and 1.5-N- KNbO<sub>3</sub> (b)

## SI 10. Mechanism of NO removal over KNbO<sub>3</sub>

### 1. The adsorption process of NO over KNbO<sub>3</sub> in the dark:

(1) The NO reacted with surface hydroxyl groups:

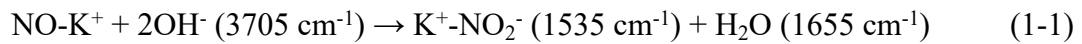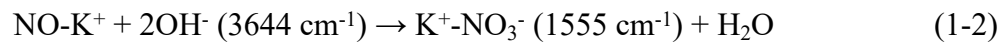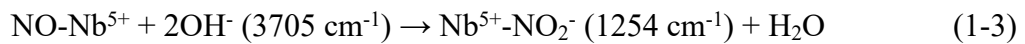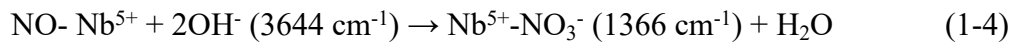

### 2. The photocatalytic oxidation of NO over KNbO<sub>3</sub>:

(1) Photogenerated electrons and holes were generated under visible light:

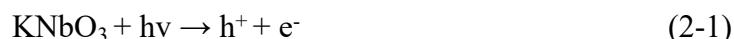

(2) The Photogenerated holes reacted with surface hydroxyl groups and water to generate hydroxyl radicals:

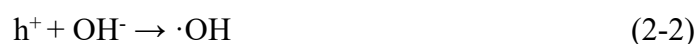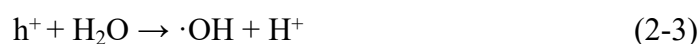

(3) The  $\cdot\text{OH}$  interacted with NO to generate nitrate or nitrite:

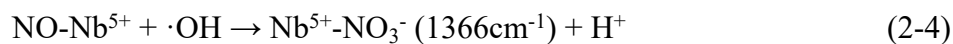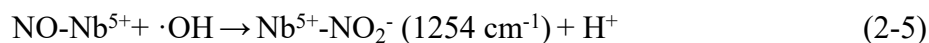

## References

- [1] Q. Ji, L. Bi, J. Zhang, H. Cao and X. S. Zhao, *Energy Environ. Sci.*, 2020, **13**, 1408-1428.
- [2] X. Pan, M. Q. Yang, X. Fu, N. Zhang and Y. J. Xu, *Nanoscale*, 2013, **5**, 3601-3614.
- [3] G. Cheng, X. Tan, X. Song, X. Chen, W. Dai, R. Yuan and X. Fu, *Appl. Catal. B-Environ.*, 2020, **277**, 119196.
- [4] H. Shao, X. Bai, H. Cui, G. Pan, P. Jing, S. Qu, J. Zhu, Y. Zhai, B. Dong and H. Song, *Nanoscale*, 2018, **10**, 1023-1029.
- [5] M. Hu, S. Du, B. Dong, Y. Qi, Z. Feng and F. Zhang, *J. Mater. Chem. A*, 2022, **10**, 16541-16546.
- [6] X. Song, G. Qin, G. Cheng, W. Jiang, X. Chen, W. Dai and X. Fu, *Appl. Catal. B-Environ.*, 2021, **284**, 119761.
